# Supplementary material for: Tracing the geographic origin of velvet antlers in China via stable isotope analyses
Source: Royal Society of Chemistry journal article supplement (doi:10.1039/d2ra02649j), 2022-01-01
Supplement: d2ra02649j1.pdf [file d2ra02649j1.pdf]

Supplemental Figure

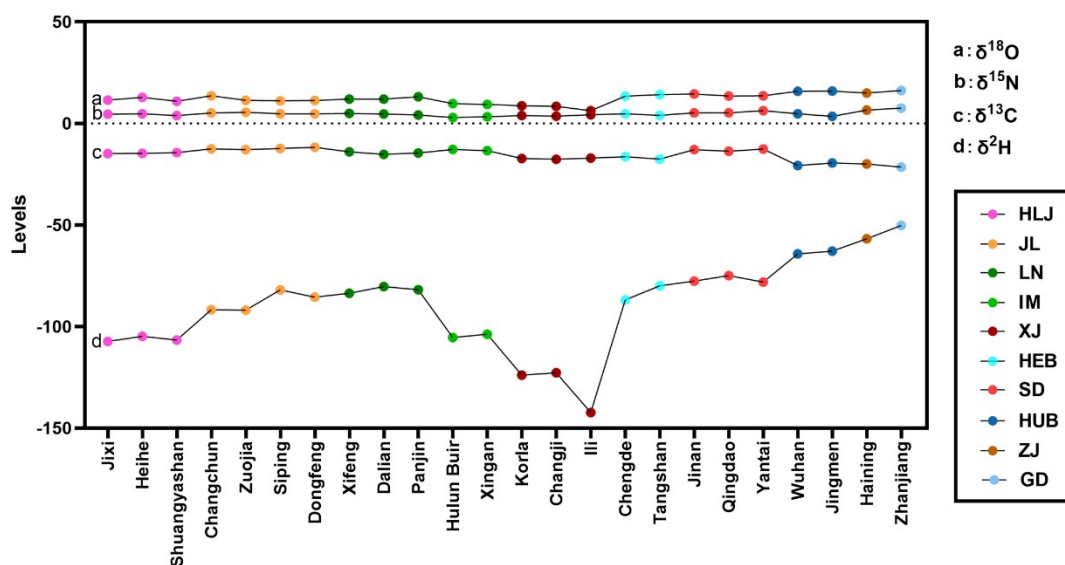

**Figure S1.** Isotopic values of the defatted dry VAs collected from the 24 regions in ten provinces of China. Note that the differences in  $\delta^2\text{H}$  were most significant in different regions; antlers from Ili had the lowest  $\delta^2\text{H}$  values, while Zhanjiang had the highest  $\delta^2\text{H}$  values among all regions; abbreviations as per Figure 2.
